# Supplementary material for: Self-assembly of hierarchically ordered CdS quantum dots–TiO2 nanotube array heterostructures as efficient visible light photocatalysts for photoredox applications
Source: Royal Society of Chemistry journal article supplement (doi:10.1039/c3ta12856c), 2013-01-01
Supplement: c3ta12856c.pdf [file c3ta12856c.pdf]

## *Supporting information for the manuscript*

# Self-Assembly of Hierarchically Ordered CdS Quantum Dots-TiO<sub>2</sub> Nanotube Arrays Nanostructure as Efficient Visible Light Photocatalyst for Photoredox Applications

*Fang-Xing Xiao, Jianwei Miao, Hsin-Yi Wang, Bin Liu\**

School of Chemical and Biomedical Engineering, Nanyang Technological University, 62

Nanyang Drive, Singapore 637459, Singapore. Fax: (65) 6794-7553; Tel: (65) 6513-7971;

E-mail: [liubin@ntu.edu.sg](mailto:liubin@ntu.edu.sg)

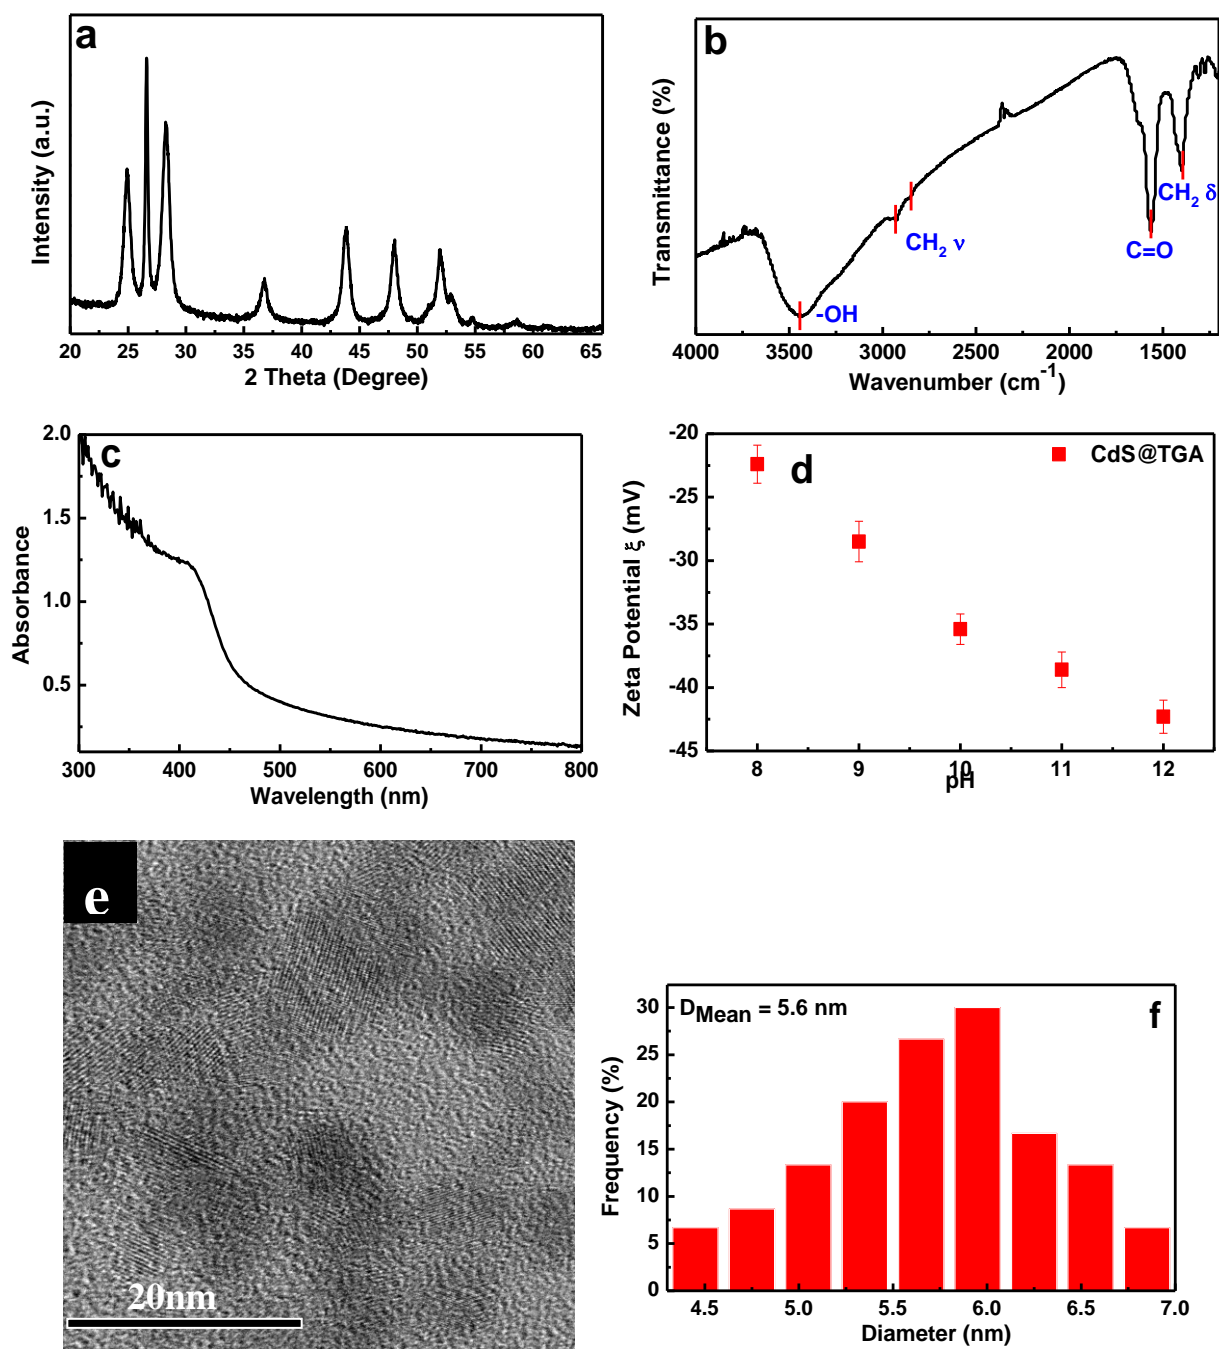

Figure S1. (a) XRD pattern, (b) FTIR, (c) UV-vis spectrum, (d) zeta potential, (e) HRTEM image and (f) mean diameter histogram of CdS@TGA QDs.

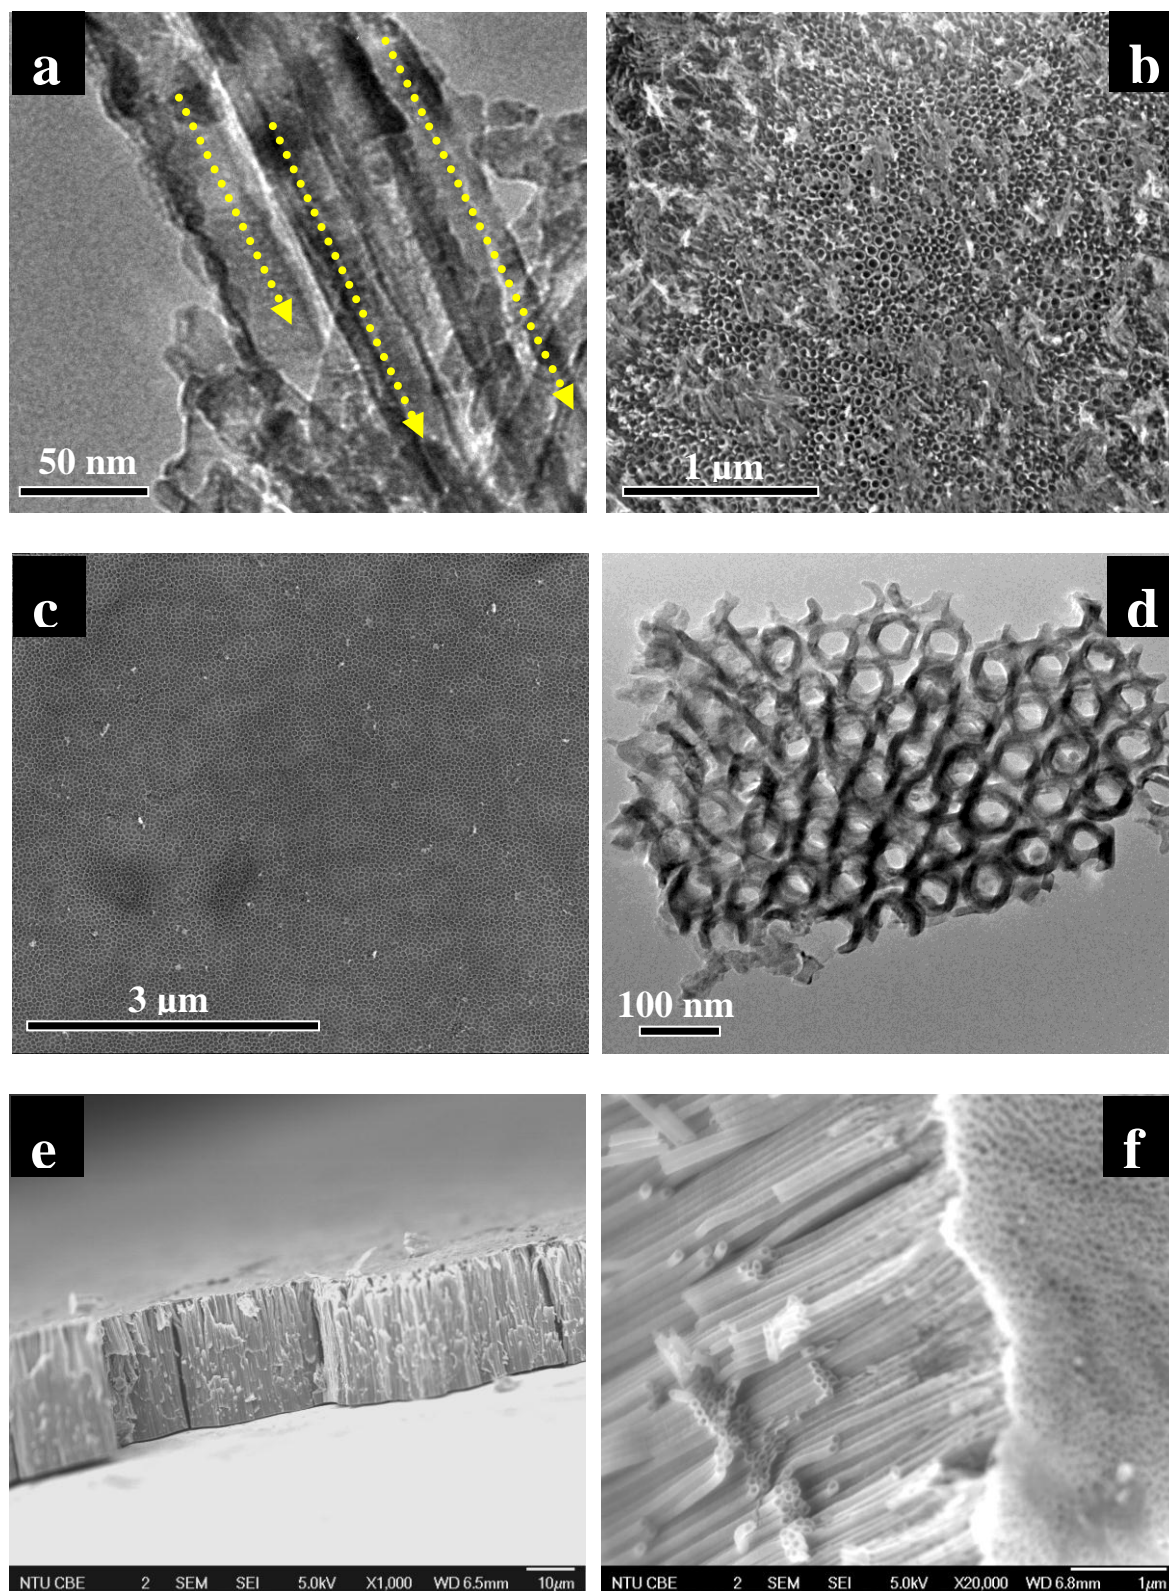

Figure S2. (a) HRTEM image of NP-TNTAs, (b) TNTAs prepared by 1<sup>st</sup> anodization, (c) panoramic FESEM image of nano-ring pattern on the surface of Ti foil after sonication, (d) TEM image of nanoring layer peeled off from NP-TNTAs, (e & f) cross-sectional FESEM images of NP-TNTAs.

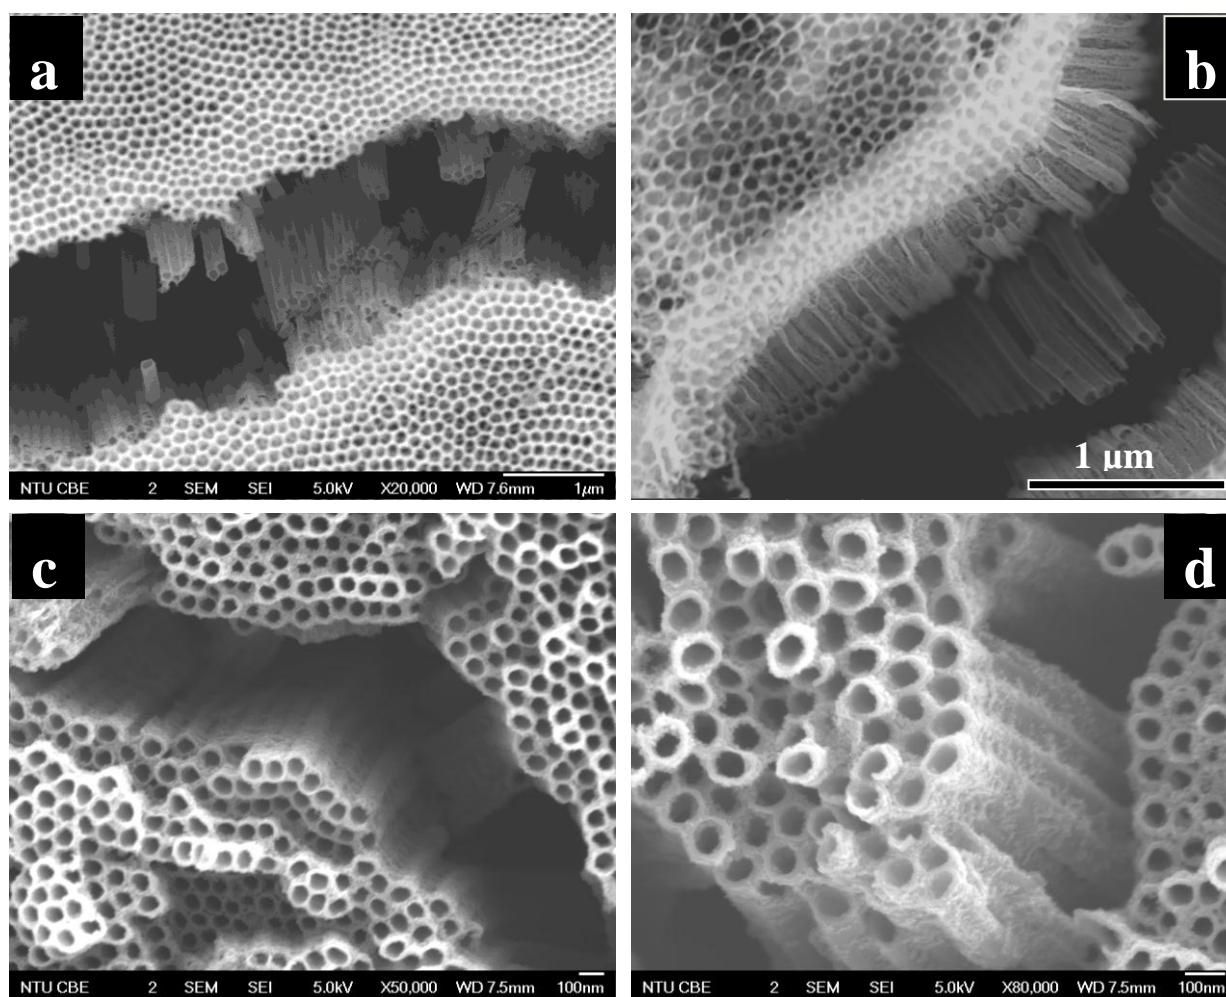

Figure S3. (a&b) Top view FESEM images of NP-TNTAs consisting of nano-ring/nanotube hybrid nanostructure; (c-d) FESEM images of bottom layer of the CdS/NP-TNTAs heterostructure when top nano-ring pattern was removed *via* gentle sonication.

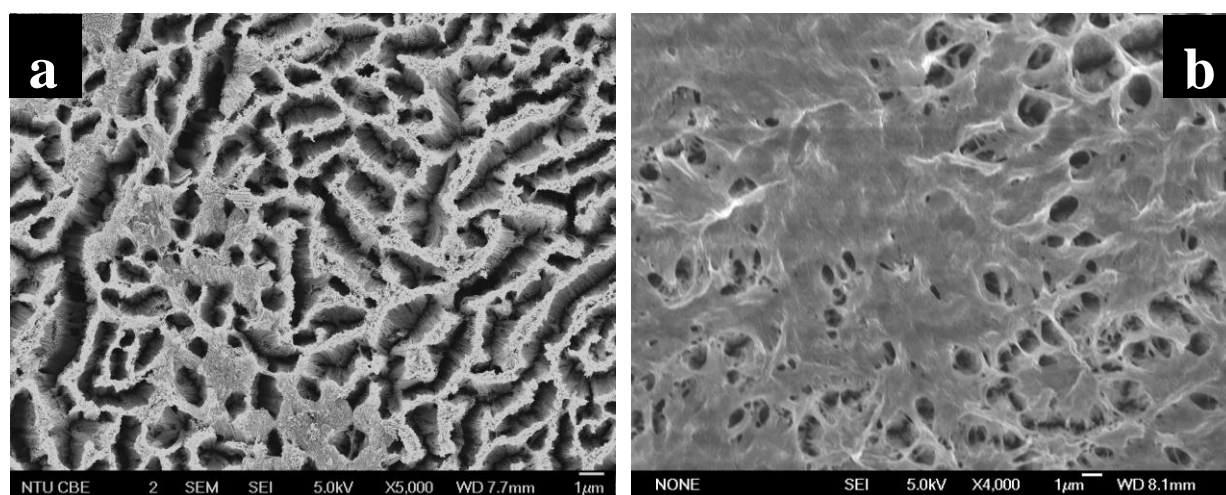

Figure S4. FESEM images of CdS/TNTAs *via* the same self-assembly strategy.

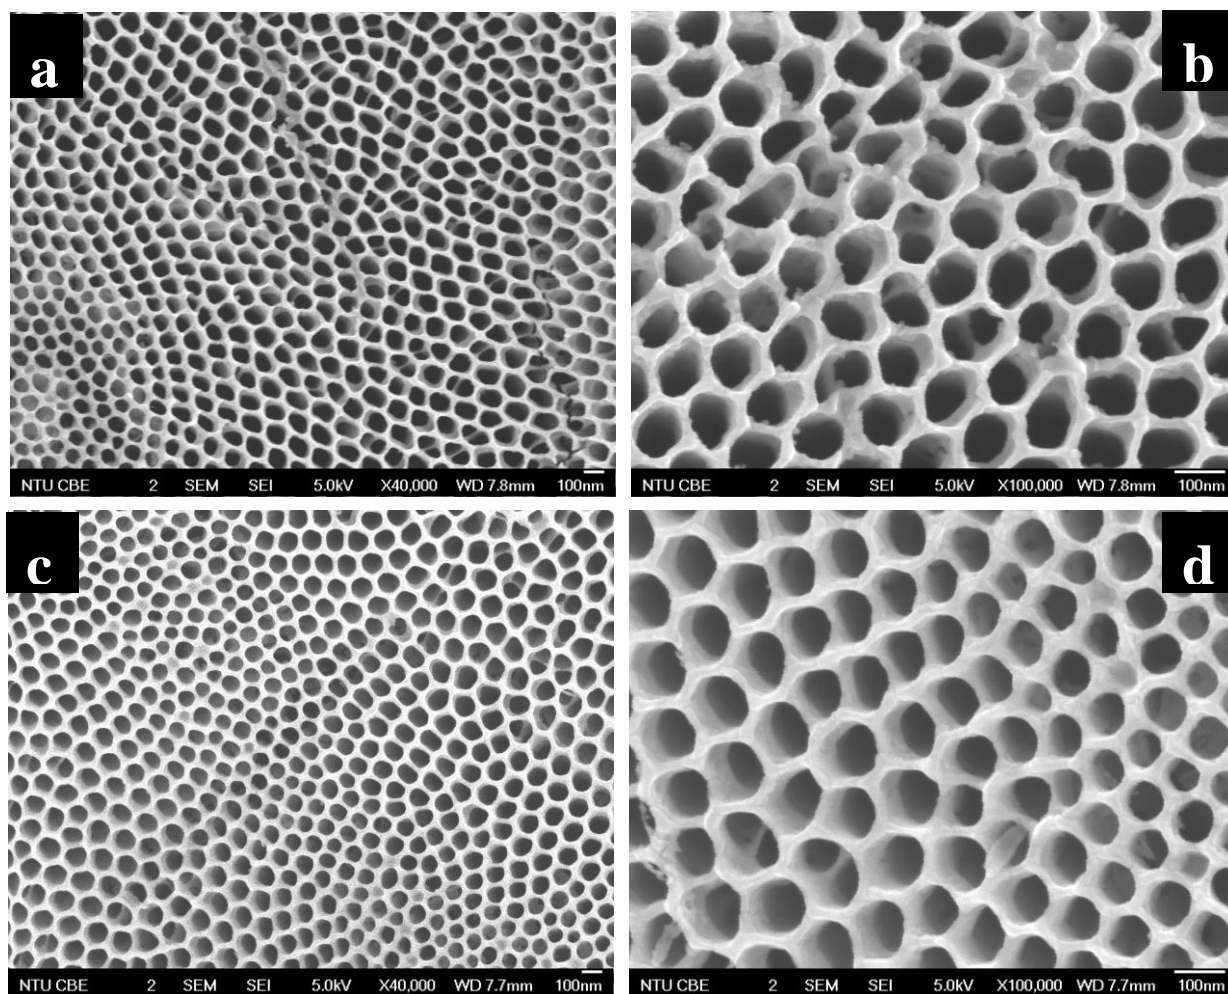

Figure S5. FESEM images of NP-TNTAs with different dipping time in PDDA aqueous solution (1 mg/mL, 0.5 M NaCl), (a&b) 15 min, and (c&d) 30 min, showing almost the same morphology to that of pure NP-TNTAs before dipping.

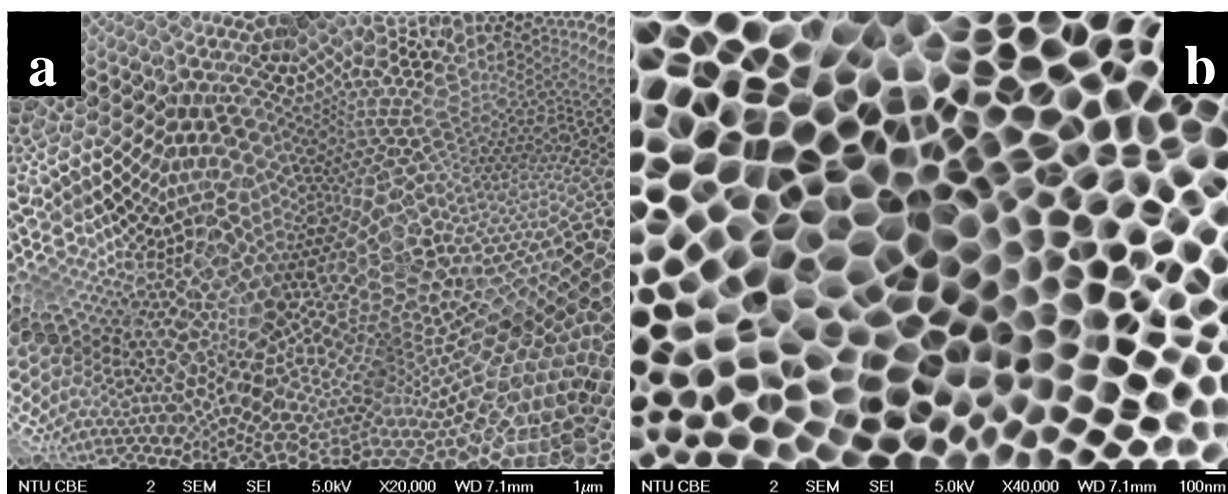

Figure S6. (a) Low and (b) high magnified FESEM images of NP-TNTAs directly dipped in the CdS QDs aqueous solution for the same time without the PDDA modification.

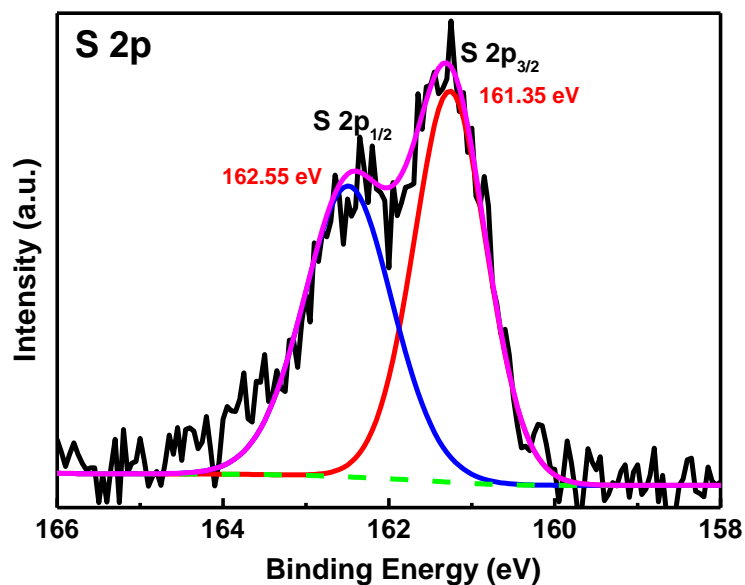

Figure S7. High-resolution spectrum of S 2p for CdS/NP-TNTAs heterostructure.

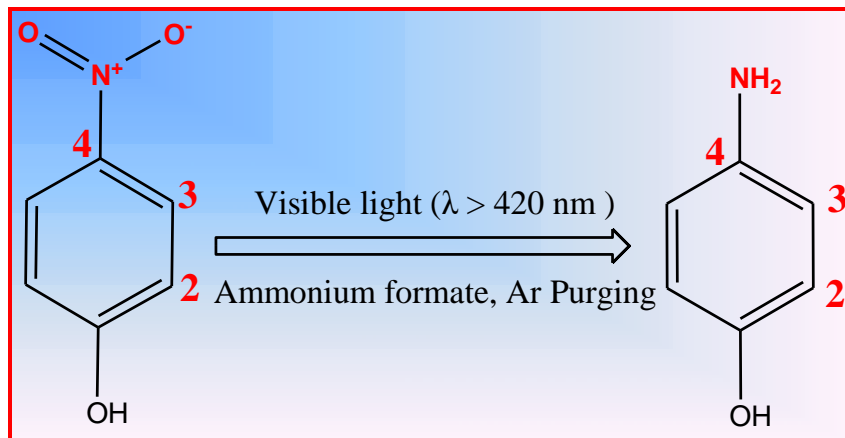

Figure S8. Photocatalytic reduction reactions of 4-NP, 3-NP and 2-NP over CdS/NP-TNTAs heterostructure under ambient conditions.

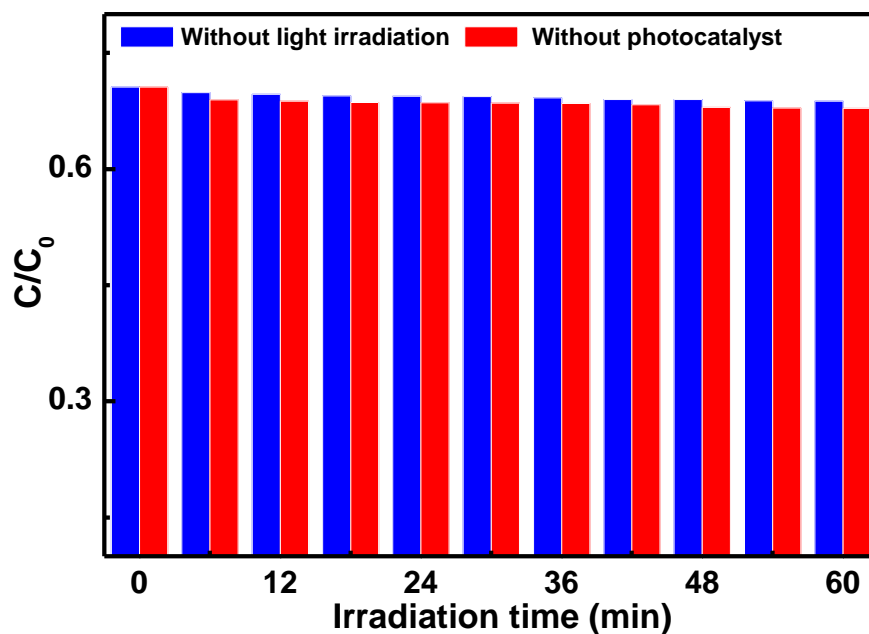

Figure S9. Control experiments for photocatalytic reduction of 4-NP over the CdS/NP-TNTAs heterostructure.

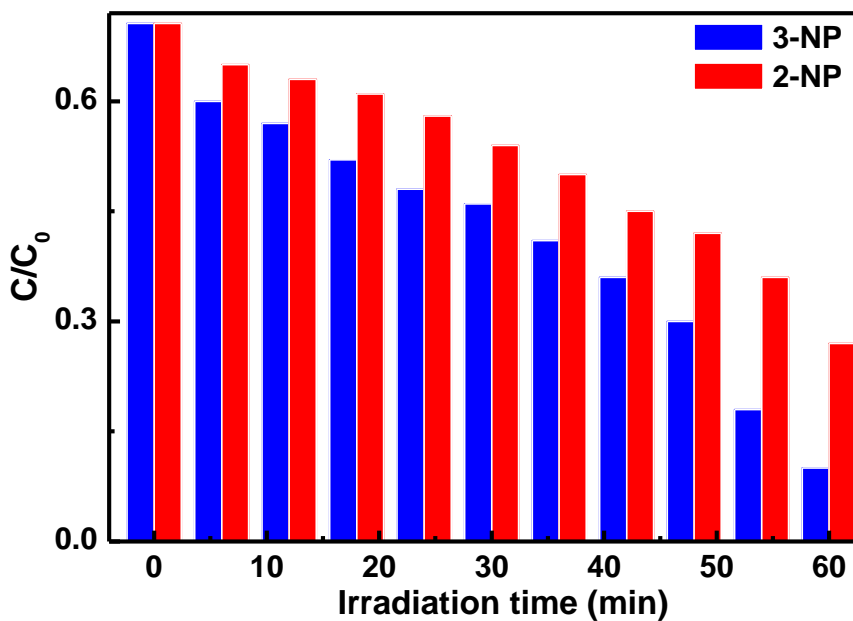

Figure S10. Photocatalytic reduction of homologues of 4-NP, (*i.e.* 3-NP and 2-NP) over CdS/NP-TNTAs heterostructure under visible light irradiation ( $\lambda > 420$  nm) with the addition of ammonium formate as quencher for photogenerated holes and Ar purge under ambient conditions in the aqueous phase.

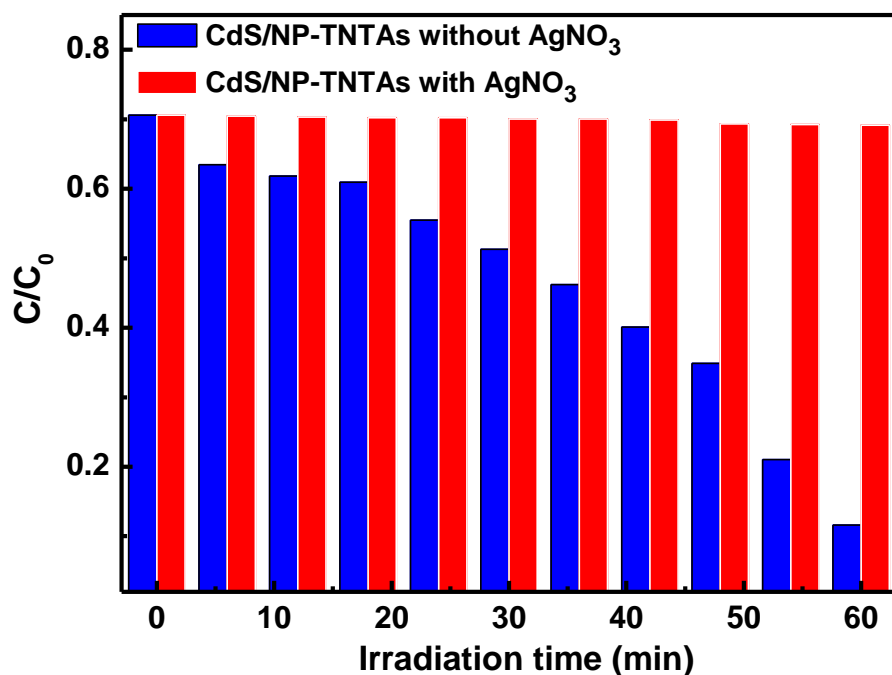

Figure S11. Control experiments using AgNO<sub>3</sub> as scavenger for photoexcited electrons for photoreduction of 4-NP over the CdS/NP-TNTAs heterostructure under visible light irradiation ( $\lambda > 420$  nm) with the addition of ammonium formate as quencher for photogenerated holes and Ar purge under ambient conditions in the aqueous phase.

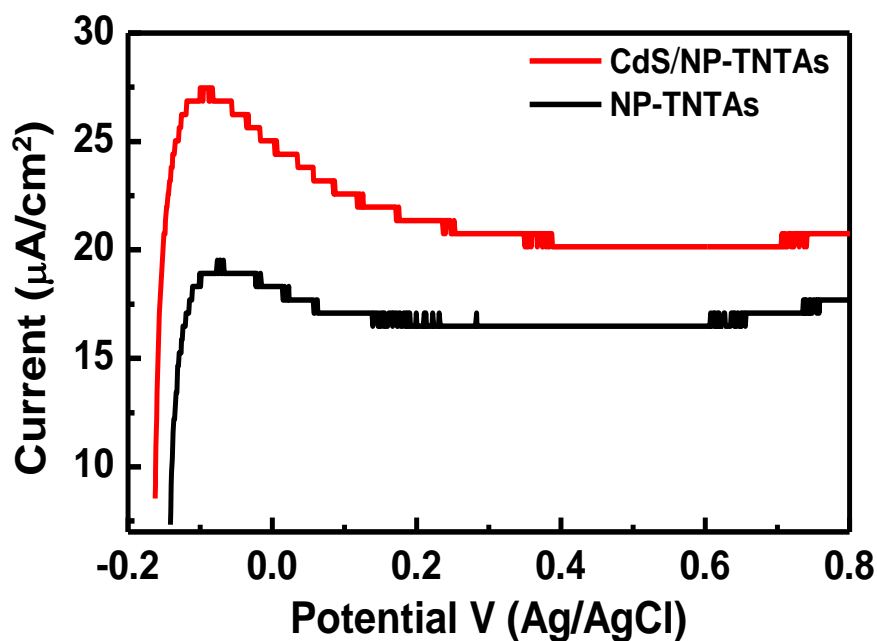

Figure S12. *I-V* curve of CdS/NP-TNTAs heterostructure and NP-TNTAs under illumination using three electrodes setup (NP-TNTAs working, Pt counter, Ag/AgCl reference electrode, scan rate: 100 mV/s).



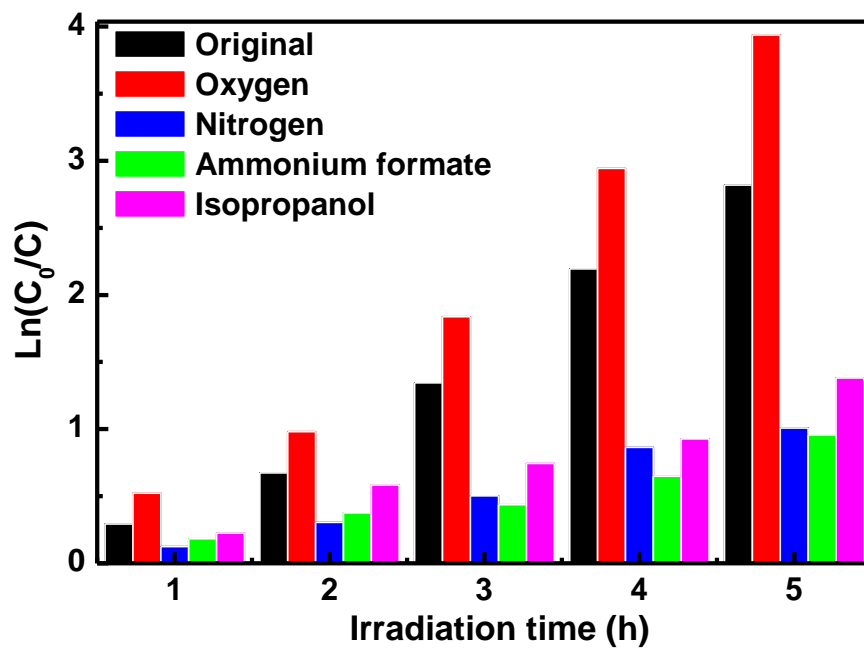

Figure S13. Photocatalytic performances of CdS/NP-TNTAs (*i.e.* photodegradation of MO) in the presence of O<sub>2</sub>, N<sub>2</sub>, ammonium formate (a scavenger for holes) and isopropanol (a scavenger for hydroxyl radicals) under ambient conditions.
